# Supplementary material for: DNAzyme-Amplified Electrochemical Biosensor Coupled with pH Meter for Ca2+ Determination at Variable pH Environments
Source: MDPI journal article supplement (doi:10.3390/nano12010004), 2021-12-21
Supplement: s1 [file s1]

# DNAzyme-Amplified Electrochemical Biosensor Coupled with pH Meter for $\text{Ca}^{2+}$ Determination at Variable pH Environments

Hui Wang <sup>1</sup>, Fan Zhang <sup>1,2</sup>, Yue Wang <sup>1,3</sup>, Fangquan Shi <sup>4</sup>, Qingyao Luo <sup>1</sup>, Shanshan Zheng <sup>1</sup>, Junhong Chen <sup>5</sup>, Dingzhen Dai <sup>5</sup>, Liang Yang <sup>1,\*</sup>, Xiangfang Tang <sup>1,\*</sup> and Benhai Xiong <sup>1,\*</sup>

<sup>1</sup> State Key Laboratory of Animal Nutrition, Institute of Animal Science, Chinese Academy of Agricultural Sciences, Beijing 100193, China; wanghui\_lunwen@163.com (H.W.); zhangfan19@139.com (F.Z.); wangyue9313@163.com (Y.W.); luqingyao@caas.cn (Q.L.); zhengshanshan@caas.cn (S.Z.)

<sup>2</sup> College of Animal Science and Technology, China Agricultural University, Beijing 100193, China

<sup>3</sup> College of Animal Science and Technology, Northwest A&F University, Yangling 712100, China

<sup>4</sup> Animal Husbandry and Veterinary Station of Xihe County, Longnan City, Gansu 742100, China; sfquan@163.com

<sup>5</sup> Department of Animal Science and Technology, Jinling Institute of Technology, Nanjing 211169, China; chenjunhong@jit.edu.cn (J.C.); dzdai@163.com (D.D.)

\* Correspondence: yangliang@caas.cn (L.Y.); tangxiangfang@caas.cn (X.T.); xiongbenhai@caas.cn (B.X.). Tel.: +86-010-62811680 (B.X.)

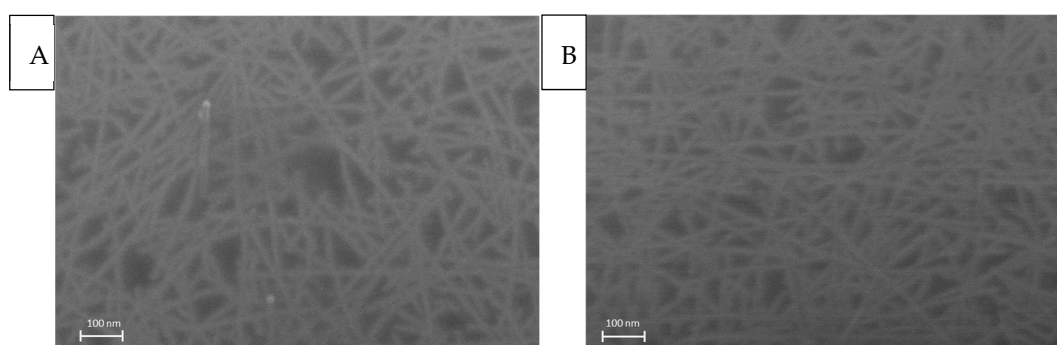

Figure S1. SEM images of GCE/SWNT(A) and GCE/SWNT/DNAzym(B)

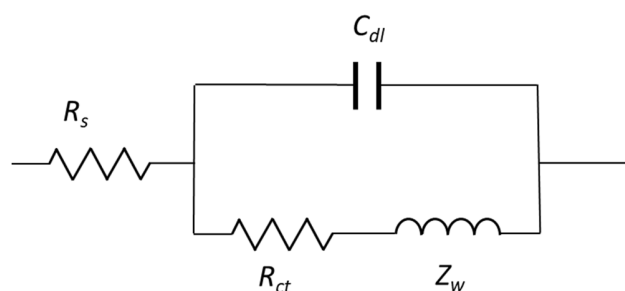

Figure S2. Randles equivalent circuit

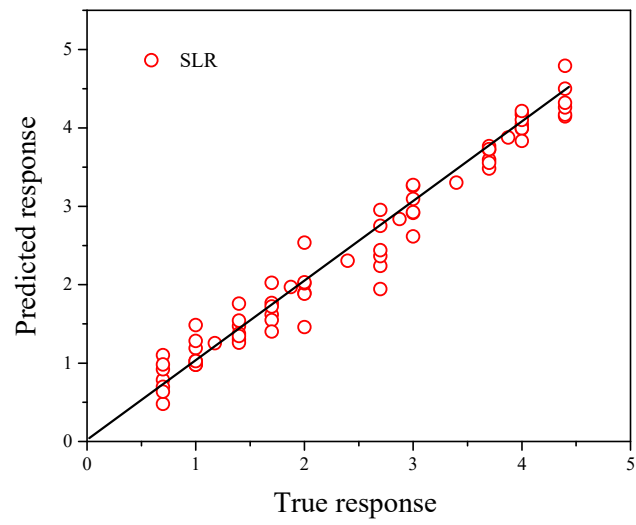

**Figure S3.** Predicted  $\text{Ca}^{2+}$  concentration against true  $\text{Ca}^{2+}$  concentration using the stepwise linear regression.

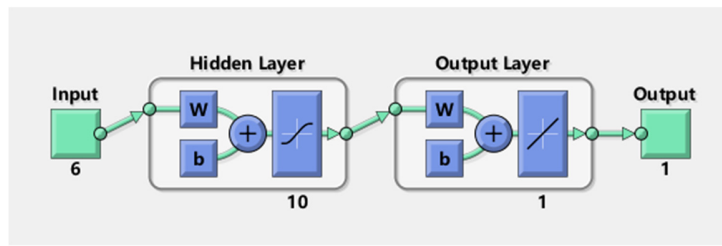

**Figure S4.** Overall structure of the NNF model with the LM algorithm.

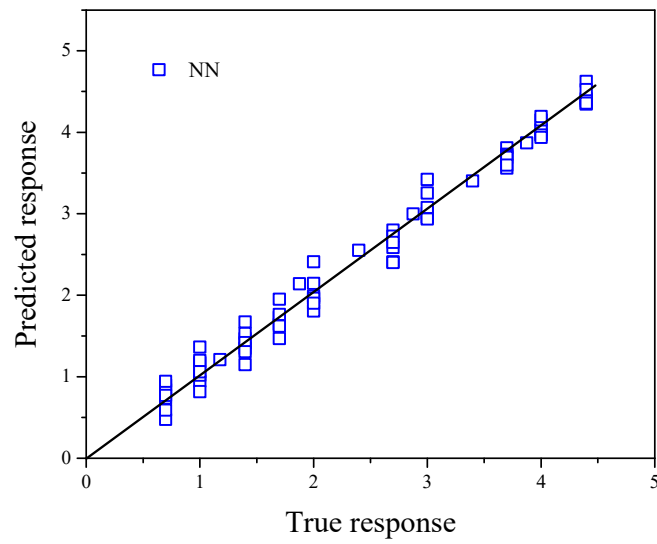

**Figure S5.** Predicted  $\text{Ca}^{2+}$  concentration against true  $\text{Ca}^{2+}$  concentration using the established NNF model.

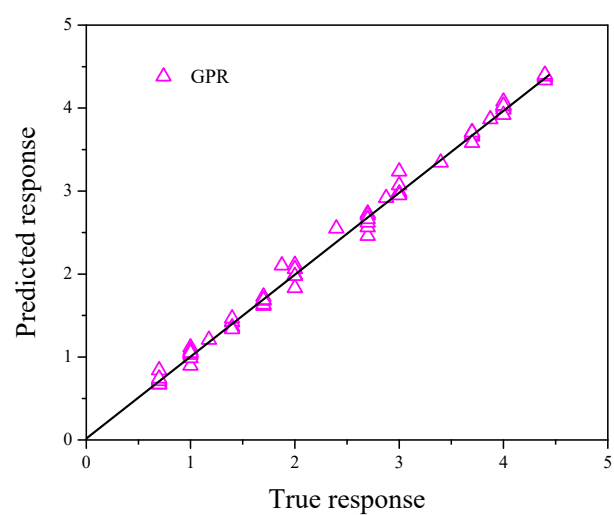

**Figure S6.** Predicted Ca<sup>2+</sup> concentration against true Ca<sup>2+</sup> concentration using the established GPR model

**Table S1.** Related indexes in dairy blood

| Metal            | Ca      | Na      | K       | Mg      | Zn          | Cu      | Fe        | Fe        | Cr |
|------------------|---------|---------|---------|---------|-------------|---------|-----------|-----------|----|
| Total Value (mM) | 2.1-2.8 | 135-148 | 4.0-5.8 | 0.7-1.2 | 0.012-0.018 | 2.3-3.1 | 12.8-42.9 | 12.8-42.9 | -  |
